# Supplementary material for: Anti-Atherosclerotic Effect of Gossypetin on Abnormal Vascular Smooth Muscle Cell Proliferation and Migration
Source: MDPI journal article supplement (doi:10.3390/antiox10091357), 2021-08-26
Supplement: s1 [file s1]

## Supplementary Data

**Table S1- Comparison of the effect of FBS *verse* PDGF and TNF- $\alpha$  in the induction of VSMCs dysfunction *in vitro***

| Inducer<br>Induction<br>of VSMCs dysfunction | Fetal bovine serum<br>(FBS)                                                                      | Plateled-derived<br>growth factor (PDGF)                                                    | Tumor necrosis<br>factor-alpha (TNF- $\alpha$ )                                                                          |
|----------------------------------------------|--------------------------------------------------------------------------------------------------|---------------------------------------------------------------------------------------------|--------------------------------------------------------------------------------------------------------------------------|
| Effective dosage                             | 10%                                                                                              | 20-100 ng/mL                                                                                | 10-100 ng/mL                                                                                                             |
| Proliferative response <sup>a</sup>          | +++ <sup>b</sup>                                                                                 | ++ <sup>b</sup> - +++ <sup>c</sup>                                                          | + <sup>b</sup>                                                                                                           |
| Migratory response <sup>d</sup>              | † <sup>e</sup>                                                                                   | †                                                                                           | †                                                                                                                        |
| Apoptosis activation <sup>f</sup>            | NA <sup>g</sup>                                                                                  | NA                                                                                          | †                                                                                                                        |
| Signaling pathway <sup>h</sup>               | P53, p21, p27, Rb/E2F1,<br>Akt, NF- $\kappa$ B, STAT3,<br>AP-1                                   | Raf-1/Rb, PI3K/Akt,<br>Ras/Erk, p38, NF- $\kappa$ B,<br>STAT3                               | Raf-1/Rb/E2F1,<br>PI3K/Akt, ERK, p38,<br>NF- $\kappa$ B, AP-1                                                            |
| Suitable model                               | Cholesterol-laden<br>atherosclerotic<br>plaques, and<br>neointimal hyperplasia<br>(restenosis)   | VSMCs differentiation,<br>vascular remodeling,<br>and aortic aneurysm<br>model construction | Inflammatory vascular<br>diseases, such as<br>atherosclerotic<br>intimal hyperplasia<br>and preeclamptic<br>hypertension |
| Reference                                    | Peppel et al. 2005<br>Wu et al. 2009<br>Davis et al. 2012<br>Chen et al. 2013<br>Lin et al. 2021 | Peppel et al. 2005<br>Wu et al. 2009<br>Davis et al. 2012                                   | Chau et al. 2004<br>Peppel et al. 2005<br>Davis et al. 2012<br>Chou et al. 2019                                          |

<sup>a</sup> Effect of different inducers on proliferative response in primary human aortic VSMCs (AoSMCs) was analyzed by bromodeoxyuridine (BrdU) incorporation assay. <sup>b</sup> Relative induction of proliferation is scored on an arbitrary 1–3 (+– +++) scale, based on fold/basal measurements derived from data of [Davis et al. 2012](#). <sup>c</sup> According to another previous studies reported by [Wu et al. \(2009\)](#) and [Chen et al. \(2013\)](#) using rat VSMCs, the result showed that 10% FBS was as effective as 20 ng/mL PDGF to promote cell proliferation. <sup>d</sup> Effect of 10% FBS *vs.* 20 ng/mL PDGF on primary rat VSMCs migratory response by wound healing and transwell assays, while effect of PDGF *vs.* TNF- $\alpha$  in the same dosage (100 ng/mL ) on primary rabbit VSMCs by transwell assay. <sup>e</sup> † represents "elevated". <sup>f</sup> [Chau et al. \(2004\)](#) has shown that TNF- $\alpha$  could induce apoptosis in VSMCs via caspase-3 activation. <sup>g</sup> NA represents "not applicable". <sup>h</sup> [Davis et al. \(2012\)](#) has revealed that PDGF and TNF- $\alpha$  have very different signaling intermediates, and their downstream functions require activation of protein kinases (PI3K/Akt, Erk and p38) and transcription factors (NF- $\kappa$ B, STAT3 and AP-1) in the induction of VSMCs dysfunction.

**Figure S1**

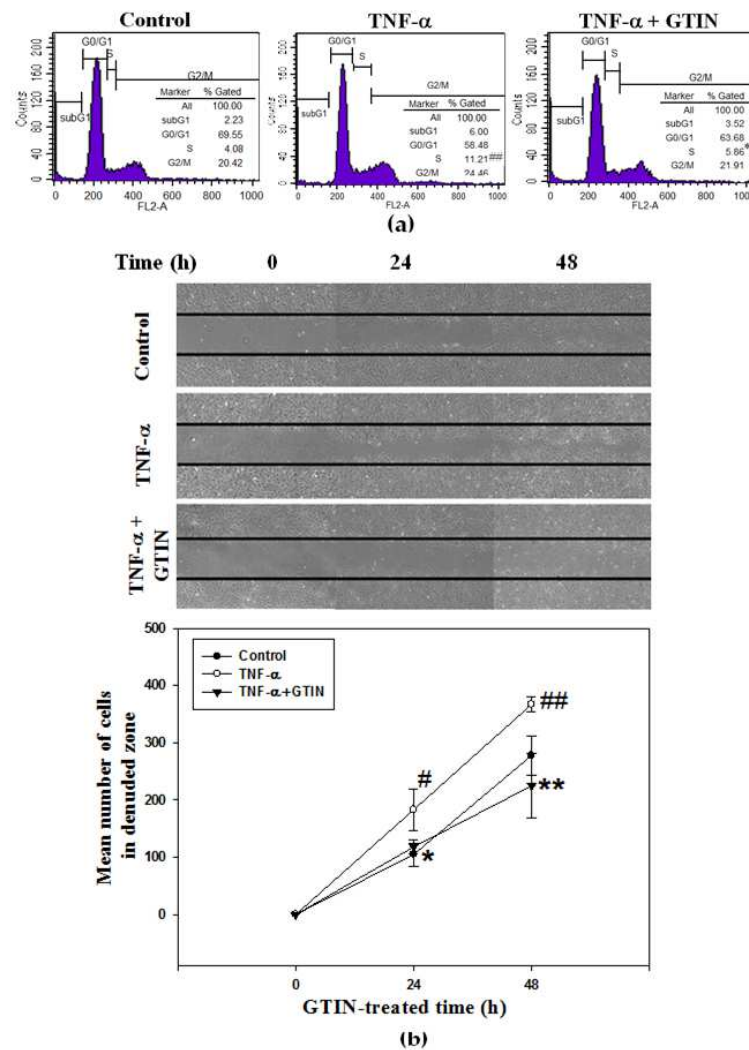

**Figure S1. GTIN inhibited cell-cycle progression and wound-healing in TNF- $\alpha$ -treated VSMCs. (a)** A7r5 cells were treated with or without TNF- $\alpha$  (10 ng/mL) in the absence or presence of 10  $\mu$ M GTIN for 24 h. the cell-cycle distribution was assayed by using flow cytometry. The quantitative assessment of the percentage of each cell phase, including subG1, G0/G1, S and G2/M phase, in the cell-cycle distribution was revealed by PI dye. ## $p$  < 0.01, compared with the control via student t-test. \*\* $p$  < 0.01 compared with the TNF- $\alpha$ -treated group via student t-test. **(b)** Monolayers of growth-arrested A7r5 cells treated with or without TNF- $\alpha$  (10 ng/mL) in the absence or presence of 10  $\mu$ M GTIN were wounded, and the cell numbers in the denuded zone were photographed and quantified for 0, 24 and 48 h. The data was showed as mean  $\pm$  SD of three repeats from at least three independent experiments. # $p$  < 0.05, ## $p$  < 0.01 compared with the 0-h control via student t-test. \* $p$  < 0.05, \*\* $p$  < 0.01 compared with compared with the respective time point of TNF- $\alpha$ -treated group via student t-test.
